# Genome-wide association study reveals candidate genes for flowering time in cowpea (*Vigna unguiculata* [L.] Walp)

1 Dev Paudel<sup>1</sup>, Rocheteau Dareus<sup>1</sup>, Julia Rosenwald<sup>2</sup>, María Muñoz-Amatriaín<sup>2</sup>, Esteban F.  
2 Rios<sup>1\*</sup>

3 <sup>1</sup>Agronomy Department, University of Florida, Gainesville, Florida, USA

4 <sup>2</sup>Soil & Crop Sciences Department, Colorado State University, Fort Collins, Colorado, USA

5 \* Correspondence:

6 Corresponding Author

7 estebanrios@ufl.edu

8 **Keywords:** GWAS, legume, breeding, SNP, gene

9 **Abstract**

10 Cowpea (*Vigna unguiculata* [L.] Walp., diploid,  $2n = 22$ ) is a major crop used as a protein source for  
11 human consumption as well as a quality feed for livestock. It is drought and heat tolerant and has  
12 been bred to develop varieties that are resilient to changing climates. Plant adaptation to new climates  
13 and their yield are strongly affected by flowering time. Therefore, understanding the genetic basis of  
14 flowering time is critical to advance cowpea breeding. The aim of this study was to perform genome-  
15 wide association studies (GWAS) to identify marker trait associations for flowering time in cowpea  
16 using single nucleotide polymorphism (SNP) markers. A total of 367 accessions from a cowpea mini-  
17 core collection were evaluated in Ft. Collins, CO in 2019 and 2020, and 292 accessions were  
18 evaluated in Citra, FL in 2018. These accessions were genotyped using the Cowpea iSelect

Consortium Array that contained 51,128 SNPs. GWAS revealed seven reliable SNPs for flowering time that explained 8-12% of the phenotypic variance. Candidate genes including *FT*, *GI*, *CRY2*, *LSH3*, *UGT87A2*, *LIF2*, and *HTA9* that are associated with flowering time were identified for the significant SNP markers. Further efforts to validate these loci will help to understand their role in flowering time in cowpea, and it could facilitate the transfer of some of this knowledge to other closely related legume species.

## 1 Introduction

Cowpea (*Vigna unguiculata* [L.] Walp., diploid,  $2n = 22$ ) is a major crop grown worldwide for food and nutritional security (Lonardi et al., 2019). It is well adapted to hot, semi-arid environments, and is highly drought and heat tolerant (Hall et al., 1997). Annual cowpea production is estimated at 7 million tons of dry grain harvested on about 14 million hectares worldwide (Singh, 2020). It is grown in over two-thirds of the developing world where it is a major source of protein for human consumption, fodder for livestock (Tarawali et al., 1997), and provides ecosystem services as a cover crop to enhance soil fertility and suppresses weeds (Martins et al., 2003; Rodrigues et al., 2013). Well-fed livestock provide meat, milk, traction, and manure that contributes towards the sustainability of farming systems (Kristjanson et al., 2001). More importantly, cowpea forms a symbiotic association with root nodulating bacteria and fixes nitrogen directly to the soil (Martins et al., 2003). This biological nitrogen fixation improves crop growth and grain production without increasing production costs associated with application of nitrogen fertilizers. Crop rotation including cowpea also helps to decrease instances of *Striga hermonthica*, a parasitic weed of cereals (Berner et al., 1996).

Plant breeders exploit germplasm diversity to generate phenotypic variation for traits under selection, primarily for those influenced by climate variability (Brummer et al., 2011). Therefore, genetic and

phenotypic characterization of germplasm collections is critical to warrant the development of resilient varieties that will sustain production under future scenarios of climate change. Previous cowpea genetic diversity study using a GoldenGate genotyping assay consisting of 1,536 single nucleotide polymorphisms (SNP)s on 442 cowpea landraces revealed the presence of two major gene pools in cultivated cowpea in Africa (Huynh et al., 2013). A diverse set of 768 cultivated cowpea genotypes from 58 countries were also studied using SNP markers from genotyping by sequencing (GBS) that divided the population into 3 gene pools (America, Africa, and Central West Asia) (Xiong et al., 2016). Lastly, a set of 368 cultivated cowpeas genotyped with 51,128 SNPs revealed six major subpoulation (Muñoz-Amatriaín et al., 2021). Large collections of diverse cowpea accessions are conserved in the International Institute of Tropical Agriculture (IITA) (~15,000 accessions), United States Department of Agriculture – Genetic Resources Information Network (USDA-GRIN) (7,737 accessions), and University of California, Riverside, USA (~6,000 accessions). The large number of conserved accessions in gene bank precludes their direct utilization in a breeding program owing to resource limitations in characterizing the whole collection. Therefore, a mini-core collection consisting 298 lines from the IITA collection were genotyped based on genotyping by sequencing (GBS) using 2,276 SNP markers in order to make the characterization and utilization of the germplasm more practical (Fatokun et al., 2018). Similarly, another mini-core collection, the ‘UCR Minicore’, consisting of 368 accessions that included landraces and breeding materials from 50 countries was also developed (Muñoz-amatriaín et al.) and genotyped using a publicly available Cowpea iSelect Consortium Array (Muñoz-Amatriaín et al., 2017). This array consists of 51,128 assays developed from sequencing 36 diverse accessions and was released to facilitate easy high-throughput genotyping in cowpea (Muñoz-Amatriaín et al., 2017). While progress has been made through conventional breeding in cowpea, the availability of these new molecular genetic tools enables application of modern breeding strategies for cowpea improvement (Gupta et al., 2014).

67 Flowering time is a key player in plant adaptation and is an important phenological trait to breed for  
68 because agronomic traits such as plant growth, plant height, and grain quality depend on the timing  
69 of flowering (Durand et al., 2012; González et al., 2016). Early flowering plants could mature earlier  
70 and help plants to avoid terminal drought stress (Kumar and Abbo, 2001). Crop legumes show large  
71 variation in flowering time, which has aided their improvement using selection and breeding (Weller  
72 and Ortega, 2015). High heritability estimates for days to flowering are reported in legumes, ranging  
73 from broad sense heritability on an entry-mean basis of 0.77 to 0.95 in soybean (Zhang et al., 2015;  
74 Mao et al., 2017), 0.38-0.75 in alfalfa (Adhikari et al., 2019), and narrow-sense heritability of 0.63 -  
75 0.86 in cowpea (Ishiyaku et al., 2005). In many species, flowering is induced in response to day  
76 length. Different flowering responses are categorized as short-day, long-day, intermediate-day, or  
77 day-neutral based on the day length requirement to induce flowering (Bastow and Dean, 2002). Most  
78 cowpea genotypes are short-day, in which flowering is favored by day lengths shorter than the  
79 corresponding nights, while some genotypes are insensitive to a wide range of photoperiods  
80 (Summerfield and Roberts, 1985). Warmer temperatures can hasten the appearance of flowers in both  
81 daylength-sensitive and insensitive genotypes (Summerfield and Roberts, 1985). The critical  
82 photoperiod for cowpea at 27°C was reported to be between 12 and 13 h day<sup>-1</sup> (Craufurd et al., 1996).

83 Owing to the importance of flowering time in cowpea, studies in the past have focused on identifying  
84 quantitative trait locus (QTL) using SNP and simple sequence repeat (SSR) markers in recombinant  
85 inbred lines (RIL). Five QTLs related to time of flower opening and three QTLs related to days to  
86 flower were identified in a RIL population of 524B x 219-01 using SSR markers (Andargie et al.,  
87 2013). SNP and SSR markers were utilized in another RIL population of ZN016 x ZJ282 to identify  
88 QTLs for days to first flowering, nodes to first flower, leaf senescence, and pod number per plant (Xu  
89 et al., 2013). One major QTL and few minor QTLs were found to dominate each of the four traits  
90 with three to four QTLs controlling individual traits. Other studies aimed at deciphering the genetics

of flowering time in cowpea have proposed one-gene (Sène, 1967) and seven-gene (Ishiyaku et al., 2005) models to control flowering. Recent advances in genomic technologies has enabled a better understanding of the genetic basis of variation using GWAS, as it can be used for identification and high resolution mapping of useful genetic variability from germplasm sets that have resulted from many rounds of historical recombination (Yu and Buckler, 2006). GWAS studies have been reported in cowpea for pod length (Xu et al., 2017), root architecture (Burridge et al., 2017), black seed coat color (Herniter et al., 2018), seed weight, length, width, and density (Lo et al., 2019), and plant productivity traits and flowering time (Muñoz-Amatriaín et al., 2021). The study of Muñoz-Amatriaín et al. (2021) evaluated flowering time in five different environments in Nigeria and California, most of which were short-day environments.

Existing genetic diversity of cowpea needs to be assessed in order to strengthen breeding programs for developing high yielding dual-purpose cultivars with good grain and fodder yields. In this study, we phenotyped the UCR Minicore in Ft. Collins, CO and Citra, FL and performed GWAS for days to flowering; and identified candidate genes related to flowering time in cowpea.

## **2 Materials and methods**

### **2.1 Germplasm, Site Description, and Experimental Design**

A total of 367 accessions from the cowpea UCR Minicore (Muñoz-Amatriaín et al., 2021) were planted in Ft. Collins, Colorado (40.6553°N, -104.9966°W) on June 17, 2019. This collection includes landraces and breeding materials from 50 countries. Seeds from each accession were planted in 6.4 m rows with 0.9 m alley and 50 seeds per plot. The experiment was set up as row/column design with one replication and augmented representation of two control lines (CB5 and CB46). Plots were irrigated at the rate of 25.4 mm every week. The experiment was repeated in 2020 when the plots were planted on June 5, 2020.

114 A total of 292 cowpea accessions from the cowpea mini-core collection that had mature pods in  
 115 October 2017 were selected from a UC-Riverside field location and planted in the field at the Plant  
 116 Science Research and Experimental Unit (PSREU), Citra, FL (29.4119°N; 82.1098°W) on  
 117 September 7, 2018 (Dareus et al., 2021). The soil was a Chipley sand (thermic, coated Aquic  
 118 Quartzipsamments) with a pH of 6.9 and characterized by high P<sub>2</sub>O<sub>5</sub> content, and low K<sub>2</sub>O, S, and  
 119 Mg content. Seeds from each accession were planted in single row of 10 plants per plot, and the  
 120 experiment was set up as a row/column design with two replications and augmented representation of  
 121 ten control lines. Each experimental unit (3 m x 0.6 m) consisted of ten plants manually seeded and  
 122 spaced at 0.3 m within row and 0.6 m between row spacing (Dareus et al., 2021).

## 123 **2.2 Phenotypic trait and analyses**

124 Days to flowering in Colorado was taken as the number of days from seeding to first time 50% of the  
 125 plants of a given accession flowered. In Florida, days to flowering was monitored every two days,  
 126 and days to first flowering was counted as the number of days from planting to the day when at least  
 127 10% of the plants in the experimental unit exhibited flowers. Descriptive analysis, and analysis of  
 128 variance (ANOVA) were conducted in the R statistical package (R Development Core Team, 2020).  
 129 Variance components were estimated using mixed linear models in ASReml-R v.4 (Butler et al.,  
 130 2017). Best linear unbiased estimate (BLUE) and best linear unbiased prediction (BLUP) for each  
 131 trait was extracted for every accession using ASREML-R (Butler et al., 2017). Broad-sense  
 132 heritability ( $H^2$ ) was calculated using variance components by the formula  $H^2=VG/(VG+VE)$ , where  
 133 VG represents genetic variance and VE represents the residual variance.

## 134 **2.3 SNP genotyping**

SNP genotyping is previously described (Muñoz-Amatriaín et al., 2017). Briefly, total genomic DNA from single plants was extracted from dried leaves using Plant DNeasy (Qiagen, Germany) and genotyped using the Cowpea iSelect Consortium Array that contained 51,128 SNPs. SNPs were called using GenomeStudio software V.2011.1 (Illumina, Inc. San Diego, CA) and the physical positions of the SNPs were determined by using the IT97K-499-35 reference genome v1.0 (Lonardi et al., 2019).

## 2.4 Genome-wide association study

Marker trait association (MTA) using all SNP markers were evaluated based on the BLUE values for days to flower. A minor allele frequency (MAF) threshold of 5% was used to remove rare variants and avoid false-positive associations. Multiple algorithms were applied for GWAS. For all SNP loci and phenotypic data, we applied the generalized linear model (GLM) and mixed linear model (MLM) implemented in GAPIT (Lipka et al., 2012). Further, GWAS was conducted using Fixed and random model Circulating Probability Unification (FarmCPU) algorithm that takes into account the confounding problem between covariates and test marker by using both Fixed Effect Model (FEM) and a Random Effect Model (REM) (Liu et al., 2016). GWAS was also conducted using BLINK that uses Bayesian Information Content (BIC) in a fixed effect model and replaces the bin approach used in FarmCPU with linkage disequilibrium (Huang et al., 2018b). Six principal components from GAPIT were used as covariates to control for population structure and manhattan plots were drawn using package *qqman* (Turner, 2014) in R statistical package (R Development Core Team, 2020).

## 2.5 Candidate gene identification

For candidate gene identification, the reference genome of cowpea IT97K-499-35 v1.0 (Lonardi et al., 2019) and the corresponding annotation (Vunguiculata\_469\_v1.1.annotation\_info.csv) and gff file (vigna\_genesv1\_1\_gff.csv) were used. A region of 270 kb above and below the significant SNPs

was further evaluated and gene models were extracted to identify candidate genes. Orthologs of these genes on *Arabidopsis* were identified and functionally characterized using TAIR database ([www.arabidopsis.org](http://www.arabidopsis.org)) and their molecular functions were elucidated. Gene models whose Gene Ontology (GO) function was related to flowering were selected as candidate genes and their function was searched in the literature.

### 3 Results

#### 3.1 Phenotypic Analysis

There was a significant variation in days to flower in all the datasets evaluated (Table 1, Figure 1). In Colorado in 2019, the average days to flowering was 75 days and in 2020 it was 72 days. Days to flowering was much earlier in Florida. In Florida in 2018, the average days to flowering was 41 days with a range of 32-69 days. Range of flowering was also shorter in Florida as compared to Colorado. Broad-sense heritability for flowering time ranged from 0.72-0.95 for the three studies. Pearson's correlation between the BLUEs for the three datasets were positive (0.44-0.81) ( $p < 0.05$ ) showing that early flowering lines in Florida also flowered early in Colorado in both years.

#### 3.2 Weather data

Daily maximum and minimum temperatures were lower in Colorado than in Florida (Supplementary Figure S1, Supplementary Figure S2, and Supplementary Figure S3). Minimum day length during the experimental period in Colorado was 12.05 hours in 2019 and 12.85 hours in 2020 while that was 10.25 hours in Florida in 2018. Daylength was slowly decreasing from planting to flowering in all the trials. In Colorado, the minimum daylength when the first plots had 50% flowering was 13.9 hours with an average temperature of 22.9°C in 2019 and 14.52 hours with average temperature of 22.8°C



179 in 2020. Minimum daylength when the first flowering occurred in Florida in 2018 was 11.65 hours  
180 with average temperature of 26.6°C.

### 181 3.3 Genome wide association studies

182 All SNP markers after filtering for MAF were used for GWAS. We identified 30 MTAs  
183 corresponding to 20 unique SNPs for days to flowering that explained 8-12% of phenotypic variance  
184 in the GWAS conducted using four software in the three datasets (Table 2). These significant MTAs  
185 were distributed across seven chromosomes of the cowpea genome (Figure 2, Supplementary Figure  
186 S4-S6). In chromosome Vu03, FarmCPU identified a single SNP (2\_03926). Multiple MTAs were  
187 identified on chromosome Vu04. FarmCPU, BLINK, and GLM identified the same significant SNP  
188 in chromosome Vu04 (2\_55402), while both BLINK and GLM identified SNP 2\_06977. GLM,  
189 FarmCPU, and BLINK further identified 7, 1, and 2 additional unique MTAs respectively, on  
190 chromosome Vu04 (Table 2). FarmCPU identified two unique MTAs (2\_42453 and 2\_43970) on  
191 chromosome Vu07. In chromosome Vu08, FarmCPU identified the same SNP (1\_0362) in two  
192 studies (Colorado 2019 and Colorado 2020). FarmCPU further identified two unique MTAs in  
193 chromosome Vu09 and one unique MTA each in chromosome Vu10 and chromosome Vu11. BLINK  
194 identified one unique MTA in chromosome Vu10 (2\_54017). MLM did not identify any significant  
195 MTAs in the three GWAS studies. Seven unique markers were reliable as they were identified by  
196 multiple algorithms or identified in more than 1 GWAS study (Table 2). In Colorado in 2019, early  
197 flowering alleles decreased flowering time by 5.50-6.93% corresponding to an average number of 4-6  
198 days (Figure 3). Similarly, in Colorado in 2020, early flowering alleles decreased flowering time by  
199 5.06-6.74% corresponding to an average number of days to 4-5 days. In Florida in 2018, early  
200 flowering alleles decreased flowering time by 6.32% corresponding to a decrease in flowering by 3  
201 days.

### 3.4 Candidate gene identification

The linkage region of the 20 significant SNPs (SNP  $\pm$  270 kb) harbored a total of 483 unique gene models on the cowpea genome. Functional annotation of these gene models using the *Arabidopsis* gene network identified a total of 12 genes that were related to flowering (Table 3). These genes included important genes like FLOWERING LOCUS T (*FT*), GIGANTEA (*GI*), Cryptochrome-2 (*CRY2*), LIGHT-DEPENDENT SHORT HYPOCOTYLS 3 (*LSH3*), REBELOTE (*RBL*) that are known to control flowering time in *Arabidopsis* and other species (El-Assal et al., 2001; Teper-Bamnolker and Samach, 2005; Prunet et al., 2008; Takeda et al., 2011; Park et al., 2020). These candidate genes were located in chromosomes Vu04, Vu07, Vu08, and Vu09. In chromosome Vu04, the peak signal at locus 2\_46442 was associated with *RBL* gene, 2\_55402 was associated with *FT* gene, and 2\_27454 was associated with *GI* gene. In chromosome Vu07, the peak signal at locus 2\_42453 was associated with two genes *CRY2* and *LSH3*. In chromosome Vu08, locus 1\_0362 was tied to three genes: *UGT87A2*, *BBX32* and Snf1 kinase interactor-like protein. Finally, in chromosome Vu09, locus 2\_39424 was associated with *NGAI*, *DCLI*, and *LIF2* while locus 2\_04844 was associated with *HTA9*.

## 4 Discussion

This study evaluated the variation in flowering time in the cowpea UCR Minicore in two contrasting environments in Colorado and Florida. There was a wide variation in days to flower in all trials. We observed high  $H^2$  estimates (0.72-0.95) for flowering time in cowpea, which is similar to the estimates reported in other species like soybean (0.77-0.95) (Zhang et al., 2015; Mao et al., 2017), and alfalfa (0.38-0.75) (Adhikari et al., 2019). High  $H^2$  of flowering time shows the inherent genetic control of flowering as seen in other species. A  $H^2$  of 84.5% was reported for days to flower in cowpeas (Omoigui et al., 2006) and a narrow-sense heritability ( $h^2$ ) of 86% was reported in a cross

225 between photoperiod-sensitive and photoperiod-insensitive varieties with at least seven major gene  
226 pairs estimated to control time of flowering in this population (Ishiyaku et al., 2005). Since flowering  
227 time is an important trait for plant breeders, the presence of variation in flowering time for cowpea  
228 shows a large potential to manipulate its expression by breeding and selection.

229 Flowering time is a complex trait (Weller and Ortega, 2015) and is generally regulated by genetic  
230 networks composed of four main converging pathways: autonomous, gibberellin, photoperiod, and  
231 vernalization (Roux et al., 2006). These pathways integrate physiological and environmental cues to  
232 activate the transition from vegetative to reproductive stages at an optimum time (Brock et al., 2009).  
233 In *Arabidopsis*, induced mutations revealed the existence of up to 80 loci that affected flowering time  
234 (Levy and Deant, 1998). In cowpea, previous studies aimed at elucidating the genetics of flowering  
235 time have mostly focused on QTL analysis. Three QTLs related to days to flower and five QTLs  
236 related to time of flower opening were identified using 202 SSR markers in a mapping population of  
237 159 F<sub>7</sub> lines obtained by crossing a short duration variety (524B) to a long duration variety (219-01)  
238 (Andargie et al., 2013). The linkage groups in this study were not named based on the reference  
239 genome (Lonardi et al., 2019), therefore, these QTLs could not be directly compared with our results.  
240 SNP and SSR markers were utilized in another RIL population of ZN016 × ZJ282 to identify QTLs  
241 for days to first flowering, nodes to first flower, leaf senescence, and pod number per plant (Xu et al.,  
242 2013). One major QTL and few minor QTLs were found to dominate each of the four traits with  
243 three to four QTLs controlling individual traits. Similarly, two QTLs on chromosome Vu05 and  
244 chromosome Vu09 with peak SNPs at 2\_05332 (854,745 bp) and 2\_03945 (5,449,874 bp)  
245 respectively, were identified for days to flowering using 215 F<sub>8</sub> RILs derived from a cross between  
246 cultivated (IT99K-573-1-1) and wild (TVNu-1158) cowpea accession (Lo et al., 2018). Studies on  
247 the cowpea multi-parent advanced generation intercross (MAGIC) population have identified  
248 flowering time loci with up to 25% phenotypic variability explained (PVE) and additive effect size of

249 7 days under long-days but not under short-days (Olatoye et al., 2019). Drought tolerance index for  
 250 flowering time in this population identified significant SNPs (2\_06470, 2\_52919, 2\_06137, and  
 251 1\_0946) on chromosome Vu03 that were 12Mb downstream of the significant SNP identified in our  
 252 study (2\_03926) (Ravelombola et al., 2021). Researchers have proposed one-gene (Sène, 1967) and  
 253 seven-gene (Ishiyaku et al., 2005) models to control flowering in cowpea and suggest that distinct  
 254 and common genetic regulators control flowering time adaptation to both long- and short-day  
 255 photoperiod in cowpea (Olatoye et al., 2019). Few GWAS have been reported in cowpea for pod  
 256 length (Xu et al., 2017), root architecture (Burridge et al., 2017), black seed coat color (Herniter et  
 257 al., 2018), and seed weight, length, width, and density (Lo et al., 2019). The availability of the  
 258 reference genome of cowpea and the Cowpea iSelect Consortium Array have opened up new avenues  
 259 in cowpea genetic analysis (Lonardi et al., 2019). The Cowpea iSelect Consortium Array with 51,128  
 260 SNPs is an excellent tool to identify marker trait associations and population genetic studies in  
 261 cowpea (Huang et al., 2018a).

262 For GWAS, we used four algorithms implemented in GAPIT (Lipka et al., 2012), namely, GLM,  
 263 MLM, FarmCPU (Liu et al., 2016), and BLINK (Huang et al., 2018b). In a GLM, false positives are  
 264 eliminated by fitting population structure as covariate (Price et al., 2006) and in MLM, population  
 265 structure and genetic effect of each individual is fitted as covariates (Yu et al., 2006). FarmCPU  
 266 performs marker tests with associated markers as covariates in a fixed effect model (Liu et al., 2016)  
 267 and assumes that quantitative trait nucleotides (QTN) underlying the trait are distributed equally  
 268 across the genome. Optimization on the associated covariate markers is done separately in a random  
 269 effect model. On the other hand, BLINK eliminates the requirement of equal distribution of QTNs by  
 270 taking linkage disequilibrium into consideration (Huang et al., 2018b). It also replaces the Restricted  
 271 Maximum Likelihood (REML) in the mixed linear model in FarmCPU with Bayesian Information

272 Content (BIC) in a fixed effect model to boost computing speed. These algorithms identified multiple  
 273 MTAs for flowering time that were distributed in seven chromosomes in the cowpea genome.

274 Seven significant SNPs identified in our study harbored important flowering time related genes. On  
 275 chromosome Vu04, *RBL* gene was 197 kb upstream of the significant SNP (2\_46442) and this gene  
 276 redundantly influences floral meristem termination (Prunet et al., 2008). *FT* was located 124 kb  
 277 downstream of the most significant SNP (2\_55402). *FT*, together with LEAFY (*LFY*), integrates  
 278 environmental signaling for induction of flowering (Moraes et al., 2019). *Arabidopsis FT* is a  
 279 member of a six-gene family that includes another important flowering-related gene, TERMINAL  
 280 FLOWER1 (*TFL1*) that delays transition to flowering and has been identified in legumes like pea,  
 281 *Medicago*, and lotus (Hecht et al., 2005). *FT* is expressed in leaves and is induced by long-day  
 282 treatment in *Arabidopsis* (Teper-Bamnolker and Samach, 2005). Additionally, in chromosome Vu04,  
 283 *GI* was located 70 kb downstream of the most significant SNP (2\_27454). GI-mediated integration of  
 284 photoperiodic and temperature information shapes thermo-morphogenic adaptation responses in  
 285 plants that optimizes plant growth and fitness in warm climates (Park et al., 2020). A total of 11  
 286 SNPs significantly associated with flowering time were identified in chromosome Vu04 showing that  
 287 this chromosome is very important in cowpea for adaptation and selection for flowering. On  
 288 chromosome Vu07, SNP 2\_42453 harbored multiple genes. *CRY2* was located 155 kb downstream of  
 289 the SNP while *LSH3* was located 230 kb downstream of the SNP. *CRY2* is a blue light receptor that  
 290 mediates blue-light regulated cotyledon expansion and is involved in the flowering response to  
 291 photoperiod in *Arabidopsis* (El-Assal et al., 2001). It is also a positive regulator of the flowering-time  
 292 gene *CONSTANS* (Guo et al., 1998). *LSH3*, also known as *ORGAN BOUNDARY 1* encodes ALOG  
 293 family proteins and is expressed at the boundary of shoot apical meristem and lateral organs (Takeda  
 294 et al., 2011). Constitutive expression of *LSH3* and *LSH4* generates chimeric floral organs.

295 In chromosome Vu08, SNP 1\_0362 harbored 3 genes: *UGT87A2* located 212 kb downstream, *BBX32*  
296 located 137 kb upstream, and Snf1 kinase interactor-like protein located 231 kb downstream of the  
297 SNP. *UGT87A2* promotes early flowering and is an important player in the autonomous pathway  
298 (Wang et al., 2012) while *BBX32* is regulated by circadian clock and regulates flowering and  
299 hypocotyl growth (Tripathi et al., 2017). In chromosome Vu09, SNP 2\_39424 harbored three genes:  
300 *NGAI* located 170 kb downstream, *DCLI* located 144 kb downstream, and *LIF2* located 7 kb  
301 upstream of the SNP. *NGA* directs development of apical tissues in gynoecium (Ballester et al.,  
302 2015), *DCLI* promotes flowering by repressing *FLOWERING LOCUS C* (Schmitz et al., 2007), and  
303 *LIF2* regulates flower development and maintains ovary determinacy in short day conditions  
304 (Latrasse et al., 2011). Additionally, in chromosome Vu09, *HTA9* was located 60kb downstream of  
305 the SNP 2\_04844 and this gene mediates the thermo-sensory flowering response in *Arabidopsis*  
306 (Jarillo and Piñeiro, 2015). Identification of multiple significant SNPs and genes related to flowering  
307 time in the cowpea genome suggests their important role in controlling flowering time in cowpeas as  
308 well as the complex nature of flowering time trait. These genes should be the primary targets for  
309 modifications while breeding cowpea and further detailed studies of these candidate genes will help  
310 to decipher the overall mechanism of flowering in cowpea.

311 MTAs in our study could not be directly compared to previous QTL studies (Andargie et al., 2013;  
312 Xu et al., 2013) because of the absence of common markers. In a previous QTL study, two  
313 significant QTLs for days to flowering were detected, one each on chromosome 5 and chromosome 9  
314 that harbored phytochrome E and transcription factor TCP 18 that are involved in flowering time (Lo  
315 et al., 2018). Similarly, another QTL report identified three QTLs related to days to flowering, one  
316 each on LG1, LG2, and LG7 (Andargie et al., 2013). Our GWAS results detected significant reliable  
317 SNPs on chromosome Vu04 and Vu08. A recent study that utilized the SNP array in the cowpea  
318 UCR Minicore identified the same SNP (2\_06977) on chromosome 4 under long days in California

(Muñoz-Amatriaín et al., 2021). In our analysis, this SNP was identified by multiple algorithms in two different datasets and is most likely an important region of interest for flowering time. Interestingly, another study that utilized the SNP array identified two QTLs for flowering time in chromosomes 5 and 9 that could explain 20-79% of the phenotypic variance (Lo et al., 2018). On chromosome 9, the previously identified QTL was 1.3 Mb upstream of the SNP (2\_04844) identified in this study. This suggests that these regions harbor important flowering related genes. Previous studies reported that the QTLs could explain 5-18.5% (Andargie et al., 2013), 16-30% (Xu et al., 2013), and 20-79% (Lo et al., 2018) of the phenotypic variance for days to flowering depending on the population. In our study, the variation explained by the MTAs varied from 8-12%, indicating that multiple genes might be affecting the traits and those genes have small effects. Our GWAS results in Florida were limited to accessions that flowered under the long-day conditions of Riverside (CA, USA) lines only, therefore, GWAS results from this location might miss some markers that were identified in Colorado where the whole mini-core was evaluated. Nevertheless, our study contributes with a large number of MTAs in cowpea for flowering time. Several loci identified here can be further explored for use in marker-assisted selection, genomic selection, and gene discovery.

Plant breeders develop new varieties with increased yield by improving the crop's adaptability and stress tolerance (Brummer et al., 2011). Flowering time has been associated with adaptation and agronomic performance of traits in several crops. Early flowering plants could mature earlier and avoid drought stress. Considerable gains can be made to increase yield and stability of grain legumes in drought prone environments by shortening crop duration (Subbarao et al., 1995). This would be important in Colorado and other regions of the semi-arid High Plains, where dryland agriculture constitutes a significant proportion of the total cropland and where erratic precipitation patterns due to climate change are threatening the productivity and profitability of such system (Rosenzweig and Schipanski, 2019). Earlier flowering cowpea varieties could also help intensify dryland cropping



343 systems in the High Plains by providing a viable alternative to the summer fallow that precedes  
344 winter wheat (Nielsen and Vigil, 2005). In the case of Florida, although the Köppen-Trewartha  
345 Climate Classification system has classified Central/North Florida as a Subtropical and  
346 Mediterranean climate, and South Florida as a Tropical climate (Belda et al., 2014), drought stress is  
347 a seasonal abiotic stressor in the state due to its sandy soil and high evaporative demand.

348 Early flowering can be transferred to cultivated cowpea through hybridization with early flowering  
349 accessions. Selection of early flowering cowpea that performs well in subtropical regions will  
350 undoubtedly help to increase the global production of cowpea as well as help to develop climate  
351 resilient cowpea accessions. On the other hand, extended vegetative period in late maturing varieties  
352 can provide higher biomass production which would be ideal for forage and cover crop cultivation,  
353 where the crops can be terminated before they flower and seed, thus avoiding potential invasiveness.

354 Vegetative growth and rate of plant production have been shown to have additive and epistatic  
355 relationships with flowering time QTLs in common beans using comparative QTL mapping,  
356 suggesting pleiotropic effects between these traits (González et al., 2016). Further research is needed  
357 to identify the haplotypes that confer early or late flowering trait in cowpeas. This study established  
358 the basis for marker-assisted selection of flowering time in cowpea breeding programs. Additionally  
359 the recent availability of the reference genome (Lonardi et al., 2019), development of the cowpea  
360 UCR Minicore (Muñoz-Amatriaín et al., 2021), and future analysis of transcriptome profiles will  
361 facilitate identification and manipulation of causative loci governing flowering time across a broad  
362 range of environmental conditions.

## 363 5 Figure legends



Figure 1: Histogram of days to flower for the cowpea mini-core collection: (A) 367 accessions planted in 2019 in Colorado; (B) 367 accessions planted in 2020 in Colorado; and (C) 292 accessions planted in 2018 in Florida.

Figure 2: PhenoGram showing significant marker-trait associations for flowering time on each chromosome. The grey bars within each chromosome show the locus of SNPs in the chromosome. Each shape represents a significant SNP identified by the three algorithms (circle = BLINK, diamond = FarmCPU, and triangle = GLM). The color within each shape represents SNPs identified in the different studies (blue = Colorado 2019, green = Colorado 2020, and red = Florida 2018).

Figure 3. Boxplot of days to flower as affected by the alleles present on the population (A) 367 accessions of the cowpea mini-core collection planted in 2019 in Colorado; and (B) 367 accessions of the cowpea mini-core collection planted in 2020 in Colorado; and (C) 292 accessions of the cowpea mini-core collection planted in 2018 in Florida.

## 6 Table legends

Table 1. Estimates of genotypic ( $s^2_g$ ) and residual ( $s^2_e$ ) variance components, broad-sense heritability ( $H^2$ ), standard error (SE) of the  $H^2$ , number of accessions planted, mean, and range for days to flowering in the three studies.

Table 2. Significant SNPs related to days to flowering identified by multiple algorithms in genome wide association studies in the three studies along with their  $p$  value, minor allele frequency (MAF), effect, percentage of variance explained (PVE(%)) as reported by each software, and  $-\log_{10}(p)$ .

Table 3. Genes related to flowering time that are within  $\pm 270$ kb of the significant SNPs. Locus name is the name of the gene in the cowpea reference genome with start and end for each gene in the

385 chromosome, name of the associated SNP, position of the SNP, associated gene name, and locus ID  
386 of the associated gene in *Arabidopsis*.

## 387 7 Supplementary figure legends

388 Supplementary Figure S1. Daily maximum (MaxT) and minimum (MinT) temperature and  
389 photoperiod (orange line) in Ft. Collins, CO during the trial in 2019.

390 Supplementary Figure S2. Daily maximum (MaxT) and minimum (MinT) temperature and  
391 photoperiod (orange line) in Ft. Collins, CO during the trial in 2020.

392 Supplementary Figure S3. Daily maximum (MaxT) and minimum (MinT) temperature and  
393 photoperiod (orange line) in Citra, FL during the trial in 2018.

394 Supplementary Figure S4: Manhattan plots from the GWAS analysis pertaining to 367 accessions of  
395 the cowpea mini-core collection planted in 2019 in Colorado. Left panel: Negative log<sub>10</sub>-transformed  
396 P values for each SNP (y axis) are plotted against the chromosomal position (y axis). The red line  
397 represents Bonferroni-corrected threshold of 0.05 for genome-wide statistically significant  
398 associations and the blue line shows suggestive associations ( $p = 1 \times 10^{-5}$ ). Right panel shows the  
399 QQ plots where x-axis is expected negative log p-values and the y-axis is observed negative log p-  
400 values. GWAS results for days to flowering using (A) BLINK; (B) FarmCPU; (C) GLM; and (D)  
401 MLM.

402 Supplementary Figure S5: Manhattan plots from the GWAS analysis pertaining to 367 accessions of  
403 the cowpea mini-core collection planted in 2020 in Colorado. Left panel: Negative log<sub>10</sub>-transformed  
404 P values for each SNP (y axis) are plotted against the chromosomal position (y axis). The red line  
405 represents Bonferroni-corrected threshold of 0.05 for genome-wide statistically significant  
406 associations and the blue line shows suggestive associations ( $p = 1 \times 10^{-5}$ ). Right panel shows the

407 QQ plots where x-axis is expected negative log p-values and the y-axis is observed negative log p-  
408 values. GWAS results for days to flowering using (A) BLINK; (B) FarmCPU; (C) GLM; and (D)  
409 MLM.

410 Supplementary Figure S6: Manhattan plots from the GWAS analysis pertaining to 292 accessions of  
411 the cowpea mini-core collection planted in 2018 in Florida. Left panel: Negative log<sub>10</sub>-transformed P  
412 values for each SNP (y axis) are plotted against the chromosomal position (y axis). The red line  
413 represents Bonferroni-corrected threshold of 0.05 for genome-wide statistically significant  
414 associations and the blue line shows suggestive associations ( $p = 1 \times 10^{-5}$ ). Right panel shows the  
415 QQ plots where x-axis is expected negative log p-values and the y-axis is observed negative log p-  
416 values. GWAS results for days to flowering using (A) BLINK; (B) FarmCPU; (C) GLM; and (D)  
417 MLM.

## 418 **8 Conflict of Interest**

419 *The authors declare that the research was conducted in the absence of any commercial or financial*  
420 *relationships that could be construed as a potential conflict of interest.*

## 421 **9 Author Contributions**

422 ER conceived the project. ER and RD collected the phenotypic data in Florida. MM and JR collected  
423 the phenotypic data in Colorado and provided the genotypic data. DP analysed the data and wrote the  
424 manuscript. All authors reviewed the manuscript.

## 425 **10 Funding**

426 This research was partially funded by the Colorado Dry Bean Association Committee. This research  
427 was funded by the United States Agency for International Development under Cooperative

428 Agreement AID-OAA-A-15-00039, Appui à la Recherche et au Développement Agricole (AREA)  
429 project, and by the USDA National Institute of Food and Agriculture, Hatch project 1018058.

## 430 **11 Acknowledgments**

431 We would like to thank Dr. Timothy J. Close and Dr. Philip A. Roberts for providing the seeds, and  
432 Brooke Sayre-Chavez and Amanda Amsberry for their help in scoring days to flowering in Colorado.  
433 The authors thank all the Forage Breeding and Genetics Lab members and staff at the University of  
434 Florida Plant Science Research and Education Unit, Citra, FL for providing help for the field trial and  
435 data collection.

## 436 **12 References**

- 437 Adhikari, L., Makaju, S. O., and Missaoui, A. M. (2019). QTL mapping of flowering time and  
438 biomass yield in tetraploid alfalfa (*Medicago sativa* L.). *BMC Plant Biol.* 19, 1–15.  
439 doi:10.1186/s12870-019-2020-7.
- 440 Andargie, M., Pasquet, R. S., Muluvi, G. M., and Timko, M. P. (2013). Quantitative trait loci  
441 analysis of flowering time related traits identified in recombinant inbred lines of cowpea (*Vigna*  
442 *unguiculata*). *Genome* 294, 289–294.
- 443 Ballester, P., Navarrete-Gómez, M., Carbonero, P., Oñate-Sánchez, L., and Ferrándiz, C. (2015).  
444 Leaf expansion in *Arabidopsis* is controlled by a TCP-NGA regulatory module likely conserved  
445 in distantly related species. *Physiol. Plant.* 155, 21–32. doi:10.1111/pp1.12327.
- 446 Bastow, R., and Dean, C. (2002). The molecular basis of photoperiodism. *Biol. Rhythm Res.* 37, 353–  
447 380. doi:10.1016/S1534-5807(02)00296-4.
- 448 Belda, M., Holtanová, E., Halenka, T., and Kalvová, J. (2014). Climate classification revisited: From

449 Köppen to Trewartha. *Clim. Res.* 59, 1–13. doi:10.3354/cr01204.

450 Berner, D., Carsky, R., Dashiell, K., Kling, J., and Manyong, V. (1996). A land management based  
451 approach to integrated *Striga hermonthica* control in sub-Saharan Africa. *Outlook Agric.* 25,  
452 157–164. doi:10.1177/003072709602500304.

453 Brock, M. T., Stinchcombe, J. R., and Weinig, C. (2009). Indirect effects of *FRIGIDA*: Floral trait  
454 (co)variances are altered by seasonally variable abiotic factors associated with flowering time. *J.*  
455 *Evol. Biol.* 22, 1826–1838. doi:10.1111/j.1420-9101.2009.01794.x.

456 Brummer, C., Barber, W. T., Collier, S. M., Cox, T. S., Johnson, R., Murray, S. C., et al. (2011).  
457 Plant breeding for harmony between agriculture and the environment. *Front. Ecol. Environ.* 9,  
458 561–568. doi:10.1890/100225.

459 Burridge, J. D., Schneider, H. M., Huynh, B. L., Roberts, P. A., Bucksch, A., and Lynch, J. P. (2017).  
460 Genome-wide association mapping and agronomic impact of cowpea root architecture. *Theor.*  
461 *Appl. Genet.* 130, 419–431. doi:10.1007/s00122-016-2823-y.

462 Butler, D., Cullis, B. R., Gilmour, A. R., and Gogel, B. J. (2017). *ASReml-R reference manual*  
463 *version 4*. Brisbane: The State of Queensland, Department of Primary Industries and Fisheries.

464 Craufurd, P. Q., Qi, A., Summerfield, R. J., Ellis, R. H., and Roberts, E. H. (1996). Development in  
465 cowpea (*Vigna unguiculata*). III. Effects of temperature and photoperiod on time to flowering in  
466 photoperiod-sensitive genotypes and screening for photothermal responses. *Exp. Agric.* 32, 29–  
467 40. doi:10.1017/s0014479700025825.

468 Dareus, R., Acharya, J., Paudel, D., Gouveia, B. T., Lopes de Souza, C., Chase, C., et al. (2021).  
469 Phenotypic characterization of the UC-Riverside cowpea mini-core collection for phenological  
470 and agronomic traits in Florida. *Submitt. Publ.*, 1–18.

471 Durand, E., Bouchet, S., Bertin, P., Ressayre, A., Jamin, P., Charcosset, A., et al. (2012). Flowering  
472 time in maize: linkage and epistasis at a major effect locus. *Genetics* 190, 1547–1562.

473 El-Assal, S. E.-D., Carlos Alonso-Blanco, Peeters, A. J. M., Raz, V., and Koornneef, M. (2001). A  
474 QTL for flowering time in *Arabidopsis* reveals a novel allele of *CRY2*. *Nat. Genet.* 29, 435–40.  
475 doi:10.1038/ng767.

476 Fatokun, C., Girma, G., Abberton, M., Gedil, M., Unachukwu, N., Oyatomi, O., et al. (2018).  
477 Genetic diversity and population structure of a mini-core subset from the world cowpea (*Vigna*  
478 *unguiculata* (L.) Walp.) germplasm collection. *Sci. Rep.* 8, 16035.

479 González, A. M., Yuste-Lisbona, F. J., Saburido, S., Bretones, S., de Ron, A. M., Lozano, R., et al.  
480 (2016). Major contribution of flowering time and vegetative growth to plant production in  
481 common bean as deduced from a comparative genetic mapping. *Front. Plant Sci.* 7.  
482 doi:10.3389/fpls.2016.01940.

483 Guo, H., Yang, H., Mockler, T. C., and Lin, C. (1998). Regulation of flowering time by *Arabidopsis*  
484 photoreceptors. *Science*. 279, 1360–1363. doi:10.1242/dev.02340.

485 Gupta, S., Nadarajan, N., and Gupta, D. Sen (2014). Legumes in the omic era. *Legum. Omi. Era*, 1–  
486 348. doi:10.1007/978-1-4614-8370-0.

487 Hall, A. E., Singh, B. B., and Ehlers, J. D. (1997). “Cowpea Breeding,” in *Plant Breeding Reviews*,  
488 ed. J. Janick (John Wiley & Sons, Inc.), 215–274.

489 Hecht, V., Foucher, F., Ferrándiz, C., Macknight, R., Navarro, C., Morin, J., et al. (2005).  
490 Conservation of *Arabidopsis* flowering genes in model legumes. *Plant Physiol.* 137, 1420–1434.  
491 doi:10.1104/pp.104.057018.

492 Herniter, I. A., Muñoz-Amatriaín, M., Lo, S., Guo, Y. N., and Close, T. J. (2018). Identification of  
493 candidate genes controlling black seed coat and pod tip color in cowpea (*Vigna unguiculata* [L.]  
494 Walp). *G3 Genes, Genomes, Genet.* 8, 3347–3355. doi:10.1534/g3.118.200521.

495 Huang, H., Tan, H., Xu, D., Tang, Y., Niu, Y., Lai, Y., et al. (2018a). High-density genetic map  
496 construction and comparative genome analysis in asparagus bean. *Sci. Rep.* 8, 1–9.  
497 doi:10.1038/s41598-018-23173-0.

498 Huang, M., Liu, X., Zhou, Y., Summers, R. M., and Zhang, Z. (2018b). BLINK: A package for the  
499 next level of genome-wide association studies with both individuals and markers in the millions.  
500 *Gigascience* 8, 1–12. doi:10.1093/gigascience/giy154.

501 Huynh, B.-L., Close, T. J., Roberts, P. A., Hu, Z., Wanamaker, S., Lucas, M. R., et al. (2013). Gene  
502 pools and the genetic architecture of domesticated cowpea. *Plant Genome* 6, 1–8.  
503 doi:10.3835/plantgenome2013.03.0005.

504 Ishiyaku, M. F., Singh, B. B., and Craufurd, P. Q. (2005). Inheritance of time to flowering in cowpea  
505 (*Vigna unguiculata* (L.) Walp.). *Euphytica* 142, 291–300. doi:10.1007/s10681-005-2435-0.

506 Jarillo, J. A., and Piñeiro, M. (2015). H2A.Z mediates different aspects of chromatin function and  
507 modulates flowering responses in *Arabidopsis*. *Plant J.* 83, 96–109. doi:10.1111/tpj.12873.

508 Kristjanson, P., Tarawali, S., Okike, I., Singh, B. B., Thornton, P. K., Manyong, W. M., et al. (2001).  
509 *Genetically improved dual-purpose cowpea: assessment of adoption and impact in the dry*  
510 *savanna region of West Africa*. Nairobi, Kenya: International Livestock Research Institute.

511 Kumar, J., and Abbo, S. (2001). Genetics of flowering time in chickpea and its bearing on  
512 productivity in semiarid environments. *Adv. Agron.* 72, 107–138.

- 513 Latrasse, D., Germann, S., Houba-Hérin, N., Dubois, E., Bui-Prodhomme, D., Hourcade, D., et al.  
514 (2011). Control of flowering and cell fate by LIF2, an RNA binding partner of the polycomb  
515 complex component LHP1. *PLoS One* 6. doi:10.1371/journal.pone.0016592.
- 516 Levy, Y. Y., and Deant, C. (1998). Control of flowering time. *Curr. Opin. Plant Biol.* 1, 49–54.
- 517 Lipka, A. E., Tian, F., Wang, Q., Peiffer, J., Li, M., Bradbury, P. J., et al. (2012). GAPIT: Genome  
518 association and prediction integrated tool. *Bioinformatics* 28, 2397–2399.  
519 doi:10.1093/bioinformatics/bts444.
- 520 Liu, X., Huang, M., Fan, B., Buckler, E. S., and Zhang, Z. (2016). Iterative usage of fixed and  
521 random effect models for powerful and efficient genome-wide association studies. *PLoS Genet.*,  
522 1–24. doi:doi:10.1371/journal.pgen.1005767.
- 523 Lo, S., Muñoz-Amatriaín, M., Boukar, O., Herniter, I., Cisse, N., Guo, Y. N., et al. (2018).  
524 Identification of QTL controlling domestication-related traits in cowpea (*Vigna unguiculata* L.  
525 Walp). *Sci. Rep.* 8, 1–9. doi:10.1038/s41598-018-24349-4.
- 526 Lo, S., Muñoz-Amatriaín, M., Hokin, S. A., Cisse, N., Roberts, P. A., Farmer, A. D., et al. (2019). A  
527 genome-wide association and meta-analysis reveal regions associated with seed size in cowpea  
528 [*Vigna unguiculata* (L.) Walp]. *Theor. Appl. Genet.* 132, 3079–3087. doi:10.1007/s00122-019-  
529 03407-z.
- 530 Lonardi, S., Muñoz-Amatriaín, M., Liang, Q., Shu, S., Wanamaker, S. I., Lo, S., et al. (2019). The  
531 genome of cowpea (*Vigna unguiculata* [L.] Walp.). *Plant J.* 98, 767–782.  
532 doi:10.1111/tpj.14349.
- 533 Mao, T., Li, J., Wen, Z., Wu, T., Wu, C., Sun, S., et al. (2017). Association mapping of loci



534 controlling genetic and environmental interaction of soybean flowering time under various  
535 photo-thermal conditions. *BMC Genomics* 18, 1–17. doi:10.1186/s12864-017-3778-3.

536 Martins, L. M. V., Xavier, G. R., Rangel, F. W., Ribeiro, J. R. A., Neves, M. C. P., Morgado, L. B.,  
537 et al. (2003). Contribution of biological nitrogen fixation to cowpea: A strategy for improving  
538 grain yield in the semi-arid region of Brazil. *Biol. Fertil. Soils* 38, 333–339.  
539 doi:10.1007/s00374-003-0668-4.

540 Moraes, T. S., Dornelas, M. C., and Martinelli, A. P. (2019). *FT/TFL1*: Calibrating plant architecture.  
541 *Front. Plant Sci.* 10, 1–6. doi:10.3389/fpls.2019.00097.

542 Muñoz-Amatriaín, M., Lo, S., Herniter, I. A., Boukar, O., and Fatokun, C. (2021). The UCR  
543 Minicore : a valuable resource for cowpea research and breeding. *bioRxiv*, 1–18.

544 Muñoz-amatriaín, M., Lo, S., Herniter, I., Fatokun, C., Boukar, O., Guo, Y.-N., et al. Genetic  
545 characterization of the cowpea UCR Mini- Core brings insights into the genetic architecture of  
546 important agronomic traits. (in prep).

547 Muñoz-Amatriaín, M., Mirebrahim, H., Xu, P., Wanamaker, S. I., Luo, M. C., Alhakami, H., et al.  
548 (2017). Genome resources for climate-resilient cowpea, an essential crop for food security.  
549 *Plant J.* 89, 1042–1054. doi:10.1111/tpj.13404.

550 Nielsen, D. C., and Vigil, M. F. (2005). Legume green fallow effect on soil water content at wheat  
551 planting and wheat yield. *Agron. J.* 97, 684–689. doi:10.2134/agronj2004.0071.

552 Olatoye, M. O., Hu, Z., and Aikpokpodion, P. O. (2019). Epistasis detection and modeling for  
553 genomic selection in cowpea (*Vigna unguiculata* L. Walp.). *Front. Genet.* 10, 1–14.  
554 doi:10.3389/fgene.2019.00677.

555 Omoigui, L. O., Ishiyaku, M. F., Kamara, A. Y., Alabi, S. O., and Mohammed, S. G. (2006). Genetic  
556 variability and heritability studies of some reproductive traits in cowpea (*Vigna unguiculate* (L.)  
557 Walp.). *African J. Biotechnol.* 5, 1191–1195. doi:10.5897/AJB2006.000-5058.

558 Park, Y. J., Kim, J. Y., Lee, J. H., Lee, B. D., Paek, N. C., and Park, C. M. (2020). GIGANTEA  
559 shapes the photoperiodic rhythms of thermomorphogenic growth in *Arabidopsis*. *Mol. Plant* 13,  
560 459–470. doi:10.1016/j.molp.2020.01.003.

561 Price, A. L., Patterson, N. J., Plenge, R. M., Weinblatt, M. E., Shadick, N. A., and Reich, D. (2006).  
562 Principal components analysis corrects for stratification in genome-wide association studies.  
563 *Nat. Genet.* 38, 904–909. doi:10.1038/ng1847.

564 Prunet, N., Morel, P., Thierry, A. M., Eshed, Y., Bowman, J. L., Negruțiu, I., et al. (2008).  
565 *REBELOTE*, *SQUINT*, and *ULTRAPETALA1* function redundantly in the temporal regulation of  
566 floral meristem termination in *Arabidopsis thaliana*. *Plant Cell* 20, 901–919.  
567 doi:10.1105/tpc.107.053306.

568 R Core Team (2018). R: A language and environment for statistical computing. *R Found. Stat.*  
569 *Comput.* doi:10.1007/978-3-540-74686-7.

570 Ravelombola, W., Shi, A., and Huynh, B.-L. (2021). Loci discovery, network-guided approach, and  
571 genomic prediction for drought tolerance index in a multi-parent advanced generation intercross  
572 (MAGIC) cowpea population. *Hortic. Res.* 8. doi:10.1038/s41438-021-00462-w.

573 Rodrigues, A. C., Silveira, J. A. G., Bonifacio, A., and Figueiredo, M. do V. B. (2013). Metabolism  
574 of nitrogen and carbon: Optimization of biological nitrogen fixation and cowpea development.  
575 *Soil Biol. Biochem.* 67, 226–234. doi:10.1016/j.soilbio.2013.09.001.

576   Rosenzweig, S. T., and Schipanski, M. E. (2019). Landscape-scale cropping changes in the High  
577    Plains: economic and environmental implications. *Environ. Res. Lett.* 14, 124088.  
578    doi:10.1088/1748-9326/ab5e8b.

579   Roux, F., Touzet, P., Cuguen, J., and Le Corre, V. (2006). How to be early flowering: an  
580    evolutionary perspective. *Trends Plant Sci.* 11, 375–81. doi:10.1016/j.tplants.2006.06.006.

581   Schmitz, R. J., Hong, L., Fitzpatrick, K. E., and Amasino, R. M. (2007). *DICER-LIKE 1* and *DICER-*  
582    *LIKE 3* redundantly act to promote flowering via repression of *FLOWERING LOCUS C* in  
583    *Arabidopsis thaliana*. *Genetics* 176, 1359–1362. doi:10.1534/genetics.107.070649.

584   Sène, D. (1967). Déterminisme génétique de la précocité chez *Vigna unguiculata* (L.) Walp.

585   Singh, B. (2020). *Cowpea: the food legume of the 21st century*. John Wiley & Sons.

586   Subbarao, G. V., Johansen, C., Slinkard, A. E., Nageswara Rao, R. C., Saxena, N. P., and Chauhan,  
587    Y. S. (1995). Strategies for improving drought resistance in grain legumes. *CRC. Crit. Rev.*  
588    *Plant Sci.* 14, 469–523. doi:10.1080/07352689509701933.

589   Summerfield, R. J., and Roberts, E. H. (1985). “*Vigna unguiculata*,” in *Handbook of flowering* (Boca  
590    Raton, FL, USA: CRC Press), 171–184.

591   Takeda, S., Hanano, K., Kariya, A., Shimizu, S., Zhao, L., Matsui, M., et al. (2011). CUP-SHAPED  
592    COTYLEDON1 transcription factor activates the expression of *LSH4* and *LSH3*, two members  
593    of the ALOG gene family, in shoot organ boundary cells. *Plant J.* 66, 1066–1077.  
594    doi:10.1111/j.1365-313X.2011.04571.x.

595   Tarawali, S. A., Singh, B. B., Peters, M., and Blade, S. F. (1997). Cowpea haulms as fodder. *Adv.*  
596    *cowpea Res.* 10, 313–325.

597 Teper-Bamnolker, P., and Samach, A. (2005). The flowering integrator FT regulates *SEPALLATA3*  
598 and *FRUITFULL* accumulation in *Arabidopsis* leaves. *Plant Cell* 17, 2661–2675.  
599 doi:10.1105/tpc.105.035766.

600 Tripathi, P., Carvallo, M., Hamilton, E. E., Preuss, S., and Kay, S. A. (2017). *Arabidopsis* B-BOX32  
601 interacts with CONSTANS-LIKE3 to regulate flowering. *Proc. Natl. Acad. Sci. U. S. A.* 114,  
602 172–177. doi:10.1073/pnas.1616459114.

603 Turner, S. D. (2014). qqman: an R package for visualizing GWAS results using Q-Q and manhattan  
604 plots. *bioRxiv*, 1–2. doi:https://doi.org/10.1101/005165.

605 Wang, B., Jin, S. H., Hu, H. Q., Sun, Y. G., Wang, Y. W., Han, P., et al. (2012). *UGT87A2*, an  
606 *Arabidopsis* glycosyltransferase, regulates flowering time via *FLOWERING LOCUS C*. *New*  
607 *Phytol.* 194, 666–675. doi:10.1111/j.1469-8137.2012.04107.x.

608 Weller, J. L., and Ortega, R. (2015). Genetic control of flowering time in legumes. *Front. Plant Sci.*  
609 6, 182–188. doi:10.3389/fpls.2015.00207.

610 Xiong, H., Shi, A., Mou, B., Qin, J., Motes, D., Lu, W., et al. (2016). Genetic diversity and  
611 population structure of cowpea (*Vigna unguiculata* L. walp). *PLoS One* 11, 1–15.  
612 doi:10.1371/journal.pone.0160941.

613 Xu, P., Wu, X., Muñoz-Amatriaín, M., Wang, B., Wu, X., Hu, Y., et al. (2017). Genomic regions,  
614 cellular components and gene regulatory basis underlying pod length variations in cowpea (*V.*  
615 *unguiculata* L. Walp). *Plant Biotechnol. J.* 15, 547–557. doi:10.1111/pbi.12639.

616 Xu, P., Wu, X., Wang, B., Hu, T., Lu, Z., Liu, Y., et al. (2013). QTL mapping and epistatic  
617 interaction analysis in asparagus bean for several characterized and novel horticulturally

important traits. *BMC Genet.* 14. doi:10.1186/1471-2156-14-4.

Yu, J., and Buckler, E. S. (2006). Genetic association mapping and genome organization of maize. *Curr. Opin. Biotechnol.* 17, 155–60. doi:10.1016/j.copbio.2006.02.003.

Yu, J., Pressoir, G., Briggs, W. H., Bi, I. V., Yamasaki, M., Doebley, J. F., et al. (2006). A unified mixed-model method for association mapping that accounts for multiple levels of relatedness. *Nat. Genet.* 38, 203–208. doi:10.1038/ng1702.

Zhang, J., Song, Q., Cregan, P. B., Nelson, R. L., Wang, X., Wu, J., et al. (2015). Genome-wide association study for flowering time, maturity dates and plant height in early maturing soybean (*Glycine max*) germplasm. *BMC Genomics* 16, 1–11. doi:10.1186/s12864-015-1441-4.

### 13 Data Availability Statement

The genetic data used in this study is available at (Muñoz-Amatriaín et al., 2021).

### 14 Contribution to the Field Statement

Plant adaptation to new climates and their yield are strongly affected by flowering time. Early flowering plants could mature earlier and avoid drought stress. This might be a good adaptation strategy to cope with impending climate change crisis, especially in regions with lower access to irrigation water. Therefore, understanding the genetic basis of flowering time is critical to advance plant breeding. Genome wide association studies for flowering time have been done in other species, however, this has not been widely reported in cowpea. Cowpea is highly heat tolerant and is an important crop to breed for new varieties that are resilient to changing climates. Cowpea is a major source of protein for human consumption as well as a quality forage for animal feed. To facilitate future plant breeding efforts, we have identified marker trait associations related to flowering time in a cowpea mini-core collection. This study contributed large number of marker trait associations in

640 cowpea for flowering time and identified candidate genes related to flowering time in cowpea.

641 Several loci identified here can be validated in other populations to support cowpea breeding

642 programs with introgression of favorable alleles and marker-assisted selection, genomic selection,

643 and gene discovery. To our knowledge, this is the first published study that has done GWAS for

644 flowering time in cowpea using the cowpea mini-core collection.

(A)

Colorado 2019

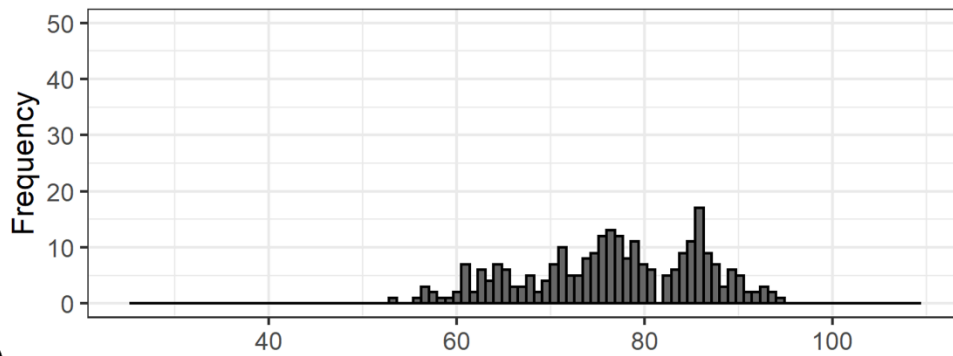

(B)

Days to flower (BLUE) 2019

Colorado 2020

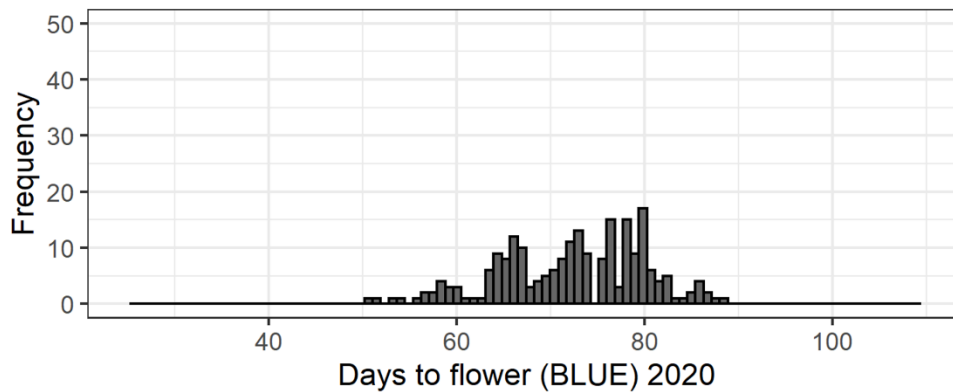

(C)

Florida 2018

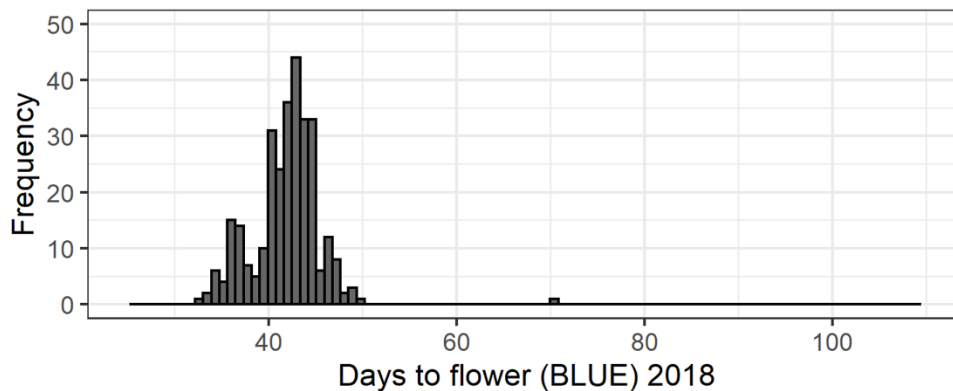

Days to flower (BLUE) 2018

645

646 Figure 1: Histogram of Days to flower for: (A) 367 accessions of the cowpea mini-core collection  
 647 planted in 2019 in Colorado; (B) 367 accessions of the cowpea mini-core collection planted in 2020  
 648 in Colorado; and (C) 292 accessions of the cowpea mini-core collection planted in 2018 in Florida.

649

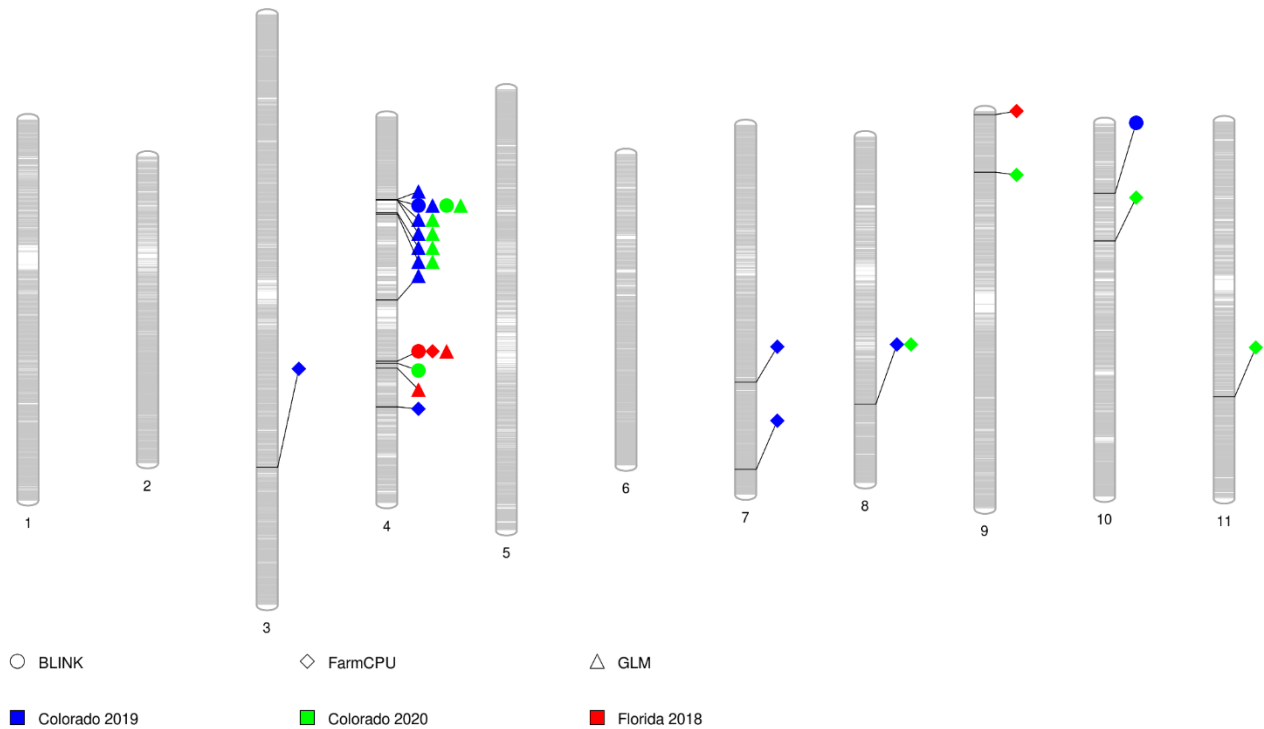

650

651 Figure 2: PhenoGram showing significant marker-trait associations for flowering time on each  
 652 chromosome. The grey bars within each chromosome show the locus of SNPs in the chromosome.

653 Each shape represents a significant SNP identified by the three algorithms (circle = BLINK, diamond  
 654 = FarmCPU, and triangle = GLM). The color within each shape represents SNPs identified in the  
 655 different studies (red = Florida 2018, blue = Colorado 2019, and green = Colorado 2020).

656

657



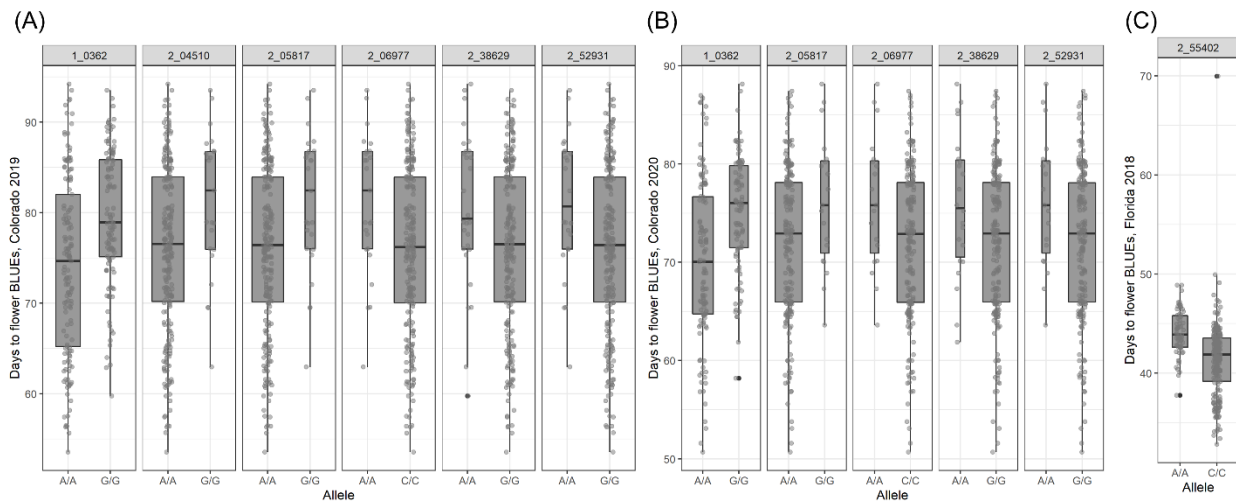

658

659 Figure 3. Boxplot of days to flower as affected by the alleles present on the population (A) 367

660 accessions of the cowpea mini-core collection planted in 2019 in Colorado; (B) 367 accessions of the

661 cowpea mini-core collection planted in 2020 in Colorado; and (C) 292 accessions of the cowpea

662 mini-core collection planted in 2018 in Florida.

663 Table 1. Estimates of genotypic ( $s^2_g$ ) and residual ( $s^2_e$ ) variance components, broad-sense heritability  
 664 ( $H^2$ ), standard error (SE) of the  $H^2$ , number of accessions planted, mean, and range for days to  
 665 flowering in the three studies.

| Location | Year | Accessions<br>Evaluated | Mean | Range  | $H^2 \pm$ SE    | $s^2_g$   | $s^2_e$ |
|----------|------|-------------------------|------|--------|-----------------|-----------|---------|
| Colorado | 2019 | 367                     | 75   | 56-100 | $0.95 \pm 0.04$ | 102.62*** | 4.07    |
| Colorado | 2020 | 367                     | 72   | 50-88  | $0.80 \pm 0.12$ | 47.62*    | 11.01   |
| Florida  | 2018 | 292                     | 41   | 32-69  | $0.72 \pm 0.06$ | 11.01***  | 2.93    |

666 ‘\*\*\*’ denotes significance at  $p < 0.001$  and ‘\*’ denotes significance at  $p < 0.05$  for the Likelihood Ratio  
 667 Tests (LRT)

668

669

670 Table 2. Significant SNPs related to days to flowering identified by multiple algorithms in genome

671 wide association studies in the three studies along with their  $p$  value, minor allele frequency (MAF),

672 effect, percentage of variance explained (PVE(%)) as reported by each software, and  $-\log_{10}(p)$ .

| SNP     | Chr. | Position | $p\_value$ | MAF  | Efect | Location | Year | Software | PVE (%) | $-\log_{10}(p)$ |
|---------|------|----------|------------|------|-------|----------|------|----------|---------|-----------------|
| 2_03926 | Vu03 | 50079486 | 7.10E-07   | 0.22 | -2.36 | Colorado | 2019 | FarmCPU  | NA      | 6.15            |
| 2_33309 | Vu04 | 9183563  | 2.34E-07   | 0.11 | -5.00 | Colorado | 2019 | GLM      | 9.20    | 6.63            |
| 2_06977 | Vu04 | 9211195  | 2.68E-14   | 0.11 | NA    | Colorado | 2019 | BLINK    | NA      | 13.57           |
| 2_06977 | Vu04 | 9211195  | 3.28E-09   | 0.11 | -5.98 | Colorado | 2019 | GLM      | 12.25   | 8.48            |
| 2_06977 | Vu04 | 9211195  | 5.37E-12   | 0.09 | NA    | Colorado | 2020 | BLINK    | NA      | 11.27           |
| 2_06977 | Vu04 | 9211195  | 8.24E-08   | 0.09 | -4.94 | Colorado | 2020 | GLM      | 11.32   | 7.08            |
| 2_52931 | Vu04 | 9224808  | 4.13E-08   | 0.09 | -5.62 | Colorado | 2019 | GLM      | 10.42   | 7.38            |
| 2_52931 | Vu04 | 9224808  | 1.03E-07   | 0.09 | -4.89 | Colorado | 2020 | GLM      | 11.13   | 6.99            |
| 2_05817 | Vu04 | 9263427  | 3.13E-08   | 0.10 | 5.61  | Colorado | 2019 | GLM      | 10.62   | 7.50            |
| 2_05817 | Vu04 | 9263427  | 1.53E-07   | 0.09 | 4.84  | Colorado | 2020 | GLM      | 10.81   | 6.81            |
| 2_04510 | Vu04 | 10681090 | 5.14E-08   | 0.09 | 5.69  | Colorado | 2019 | GLM      | 10.27   | 7.29            |
| 2_04510 | Vu04 | 10681090 | 5.64E-07   | 0.08 | 4.71  | Colorado | 2020 | GLM      | 9.77    | 6.25            |
| 2_38629 | Vu04 | 10776312 | 1.09E-06   | 0.11 | -4.54 | Colorado | 2019 | GLM      | 8.12    | 5.96            |
| 2_38629 | Vu04 | 10776312 | 1.04E-06   | 0.10 | -4.14 | Colorado | 2020 | GLM      | 9.28    | 5.98            |
| 2_46442 | Vu04 | 20308708 | 1.01E-06   | 0.38 | 3.17  | Colorado | 2019 | GLM      | 8.18    | 6.00            |
| 2_55402 | Vu04 | 27032485 | 3.10E-11   | 0.25 | -1.16 | Florida  | 2018 | FarmCPU  | NA      | 10.51           |
| 2_55402 | Vu04 | 27032485 | 3.65E-13   | 0.25 | NA    | Florida  | 2018 | BLINK    | NA      | 12.44           |
| 2_55402 | Vu04 | 27032485 | 2.40E-08   | 0.25 | -1.41 | Florida  | 2018 | GLM      | 10.11   | 7.62            |
| 2_52369 | Vu04 | 27310629 | 2.93E-07   | 0.33 | NA    | Colorado | 2020 | BLINK    | NA      | 6.53            |
| 2_22451 | Vu04 | 27793336 | 4.77E-07   | 0.18 | 1.45  | Florida  | 2018 | GLM      | 8.15    | 6.32            |
| 2_27454 | Vu04 | 32104992 | 4.58E-07   | 0.29 | 2.31  | Colorado | 2019 | FarmCPU  | NA      | 6.34            |
| 2_42453 | Vu07 | 28483321 | 3.75E-07   | 0.36 | -2.26 | Colorado | 2019 | FarmCPU  | NA      | 6.43            |
| 2_43970 | Vu07 | 38052504 | 6.80E-07   | 0.14 | -2.76 | Colorado | 2019 | FarmCPU  | NA      | 6.17            |
| 1_0362  | Vu08 | 29639172 | 2.61E-07   | 0.45 | 1.83  | Colorado | 2019 | FarmCPU  | NA      | 6.58            |
| 1_0362  | Vu08 | 29639172 | 7.07E-07   | 0.45 | 1.47  | Colorado | 2020 | FarmCPU  | NA      | 6.15            |
| 2_39424 | Vu09 | 419806   | 1.62E-08   | 0.45 | -0.79 | Florida  | 2018 | FarmCPU  | NA      | 7.79            |
| 2_04844 | Vu09 | 6752951  | 9.22E-11   | 0.27 | 2.97  | Colorado | 2020 | FarmCPU  | NA      | 10.04           |
| 2_54017 | Vu10 | 7807120  | 2.99E-08   | 0.26 | NA    | Colorado | 2019 | BLINK    | NA      | 7.52            |
| 2_42049 | Vu10 | 13068722 | 3.92E-08   | 0.12 | 4.76  | Colorado | 2020 | FarmCPU  | NA      | 7.41            |
| 2_03469 | Vu11 | 30442337 | 4.48E-07   | 0.18 | -1.96 | Colorado | 2020 | FarmCPU  | NA      | 6.35            |

673

674

675

676 Table 3. Genes related to flowering time that are within  $\pm 270$ kb of the significant SNPs. Locus name  
677 is the name of the gene in the cowpea reference genome with start and end for each gene in the  
678 chromosome, name of the associated SNP, position of the SNP, associated gene name, and locus ID  
679 of the associated gene in *Arabidopsis*.

| Locus Name     | Chr  | Start    | End      | SNP     | Position | Gene Name          | <i>Arabidopsis</i> locus ID |
|----------------|------|----------|----------|---------|----------|--------------------|-----------------------------|
| Vigun04g096400 | Vu04 | 20505963 | 20516534 | 2_46442 | 20308708 | <i>RBL</i>         | AT3G55510                   |
| Vigun04g109500 | Vu04 | 27156677 | 27161340 | 2_55402 | 27032485 | <i>FT</i>          | AT1G65480                   |
| Vigun04g126700 | Vu04 | 32034709 | 32050305 | 2_27454 | 32104992 | <i>GI</i>          | AT1G22770                   |
| Vigun07g171300 | Vu07 | 28639274 | 28644217 | 2_42453 | 28483321 | <i>CRY2</i>        | AT1G04400                   |
| Vigun07g171900 | Vu07 | 28713837 | 28716092 | 2_42453 | 28483321 | <i>LSH3</i>        | AT2G31160                   |
| Vigun08g124100 | Vu08 | 29426933 | 29428985 | 1_0362  | 29639172 | <i>UGT87A2</i>     | AT2G30140                   |
| Vigun08g127400 | Vu08 | 29776374 | 29777564 | 1_0362  | 29639172 | <i>BBX32</i>       | AT3G21150                   |
| Vigun08g128600 | Vu08 | 29870661 | 29873299 | 1_0362  | 29639172 | <i>Snf1</i> kinase | AT1G80940                   |
| Vigun09g003600 | Vu09 | 249165   | 253046   | 2_39424 | 419806   | <i>NGA1</i>        | AT2G46870                   |
| Vigun09g003800 | Vu09 | 275035   | 288027   | 2_39424 | 419806   | <i>DCL1</i>        | AT1G01040                   |
| Vigun09g005800 | Vu09 | 426595   | 430905   | 2_39424 | 419806   | <i>LIF2</i>        | AT4G00830                   |
| Vigun09g063700 | Vu09 | 6692636  | 6694999  | 2_04844 | 6752951  | <i>HTA9</i>        | AT1G52740                   |

680
